# Supplementary material for: Long-term dietary fiber intake and risk of chronic obstructive pulmonary disease: a prospective cohort study of women
Source: Springer Nature journal article supplement (doi:10.1007/s00394-019-02038-w), 2019-07-06
Supplement: 394_2019_2038_MOESM1_ESM.pdf [file 394_2019_2038_MOESM1_ESM.pdf]

## SUPPLEMENTARY MATERIAL

### Long-term dietary fiber intake and risk of COPD: a prospective cohort study of women

Maria Karolina Szmidt<sup>1\*</sup>, Joanna Kałuża<sup>1,2</sup>, Holly Ruth Harris<sup>3,4</sup>, Anders Linden<sup>5,6</sup>, Alicja Wolk<sup>2,7</sup>

**\*Corresponding author:** Maria Karolina Szmidt, Department of Human Nutrition, Warsaw University of Life Sciences – SGGW, 159C Nowoursynowska Str., 02-776 Warsaw, Poland, E-mail: [maria\\_szmidt@sggw.pl](mailto:maria_szmidt@sggw.pl), telephone number: +48 601-812-660

#### Start of follow-up

In the current study follow-up started on January 1, 2002 and ended on December 31, 2014. After examining the distribution of annual COPD incidents from 1998 to 2014 (Supplementary Figure 1), the first 4 years of follow-up (1998-2001) were lagged from the analysis, because of probable under-diagnosis at this time. The number of new diagnosis of COPD included in the analysis was 1,557 (2002-2014), instead of 1,771 (1998-2014).

Additionally, the HRs stratified by time of diagnosis were calculated (Supplementary Table 2). Despite of probable under-diagnosis in a first four years, the HRs of COPD in 1998-2014 were very similar to HRs observed in 2002-2014.

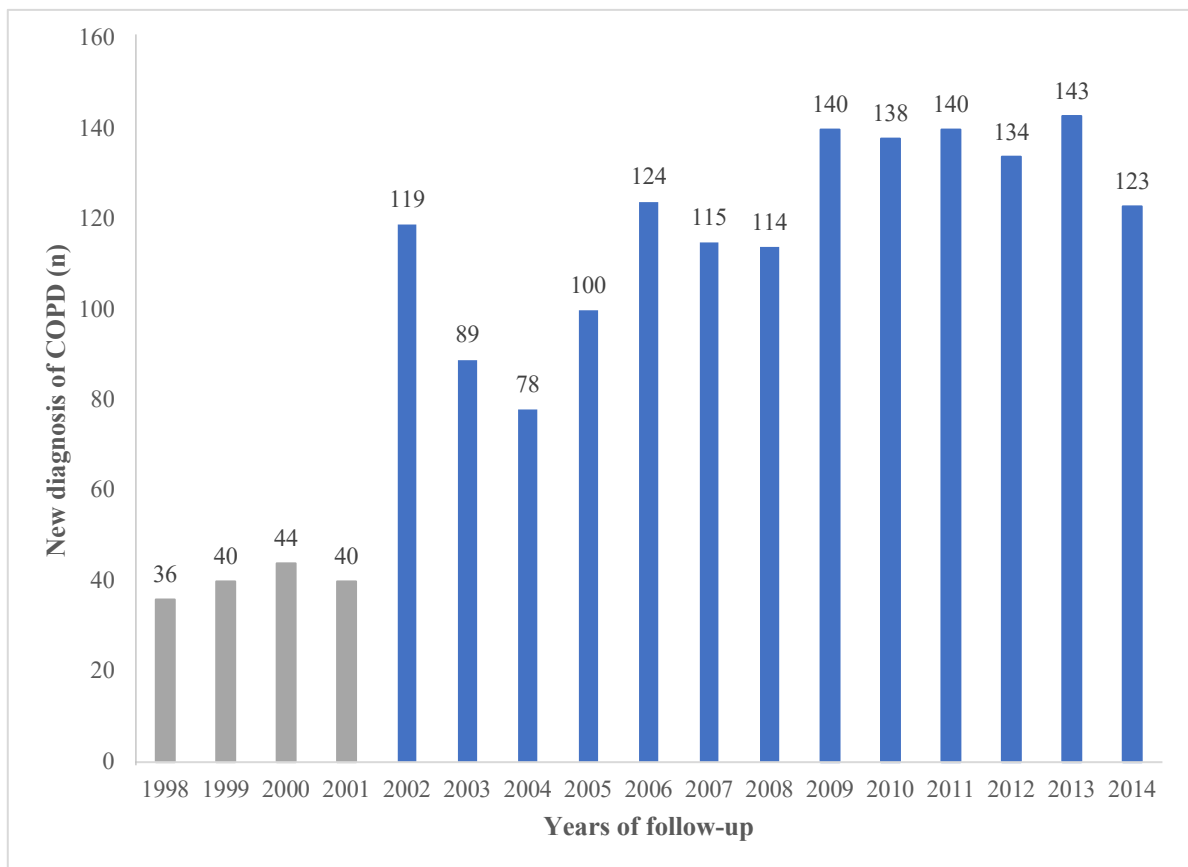

**Supplementary Figure S1.** Number of cases of new diagnosis of COPD cases identified between 1998 and 2014

**Supplementary Table S1. Food items included for each specific dietary fiber calculation in 1987 and 1997**

| Specific fiber             | 1987 FFQ                                                                                                                                                                                                                                                                                | 1997 FFQ                                                                                                                                                                                                                                                                                                                                                                                                                         |
|----------------------------|-----------------------------------------------------------------------------------------------------------------------------------------------------------------------------------------------------------------------------------------------------------------------------------------|----------------------------------------------------------------------------------------------------------------------------------------------------------------------------------------------------------------------------------------------------------------------------------------------------------------------------------------------------------------------------------------------------------------------------------|
| <b>Cereal fiber</b>        | <ul style="list-style-type: none"> <li>- wholemeal bread</li> <li>- white bread</li> <li>- crisp bread</li> <li>- oat meal/gruel/hot cereal</li> <li>- cold cereal/muesli</li> <li>- rice</li> <li>- spaghetti</li> <li>- pancakes/waffles</li> <li>- rolls/crackers/cookies</li> </ul> | <ul style="list-style-type: none"> <li>- granary/wholemeal bread</li> <li>- white bread</li> <li>- crisp bread</li> <li>- oatmeal porridge</li> <li>- bran of wheat or oats</li> <li>- other porridge/gruel</li> <li>- cereals/muesli</li> <li>- rice</li> <li>- spaghetti/macaroni</li> <li>- pizza</li> <li>- pancakes/crepes</li> <li>- gateau/pastries</li> <li>- buns and cakes</li> <li>- biscuits/wafers/rusks</li> </ul> |
| <b>Fruit fiber</b>         | <ul style="list-style-type: none"> <li>- apples/pears</li> <li>- orange/citrus fruits</li> <li>- banana</li> <li>- orange/grapefruit juice</li> <li>- jam/marmalade</li> <li>- sweet soup</li> </ul>                                                                                    | <ul style="list-style-type: none"> <li>- apple/pear</li> <li>- orange/citrus fruits</li> <li>- banana</li> <li>- berries (fresh or frozen)</li> <li>- other fruits</li> <li>- orange/grapefruit juice</li> <li>- jam/marmalade/sauce</li> <li>- stewed fruit/soup</li> </ul>                                                                                                                                                     |
| <b>Vegetable fiber</b>     | <ul style="list-style-type: none"> <li>- root vegetables</li> <li>- cruciferous vegetables</li> <li>- tomatoes</li> <li>- lettuce/cucumber</li> <li>- spinach/kale</li> </ul>                                                                                                           | <ul style="list-style-type: none"> <li>- carrots</li> <li>- beetroots</li> <li>- cabbage</li> <li>- cauliflower</li> <li>- broccoli/Brussels sprouts</li> <li>- tomatoes</li> <li>- lettuce</li> <li>- spinach</li> <li>- peppers</li> <li>- onion/leak</li> <li>- garlic</li> <li>- green peas</li> <li>- mixed frozen vegetables</li> </ul>                                                                                    |
| <b>Other fiber sources</b> | <ul style="list-style-type: none"> <li>- brown beans/pea soup</li> <li>- boiled potatoes</li> </ul>                                                                                                                                                                                     | <ul style="list-style-type: none"> <li>- beans/lentils/pea soup</li> <li>- soy bean products</li> </ul>                                                                                                                                                                                                                                                                                                                          |

|  |                                                                                                                      |                                                                                                                                                                  |
|--|----------------------------------------------------------------------------------------------------------------------|------------------------------------------------------------------------------------------------------------------------------------------------------------------|
|  | <ul style="list-style-type: none"><li>- fried potatoes</li><li>- French fries</li><li>- chips/popcorn/nuts</li></ul> | <ul style="list-style-type: none"><li>- boiled potatoes</li><li>- fried potatoes</li><li>- French fries</li><li>- chips/popcorn</li><li>- nuts/almonds</li></ul> |
|--|----------------------------------------------------------------------------------------------------------------------|------------------------------------------------------------------------------------------------------------------------------------------------------------------|

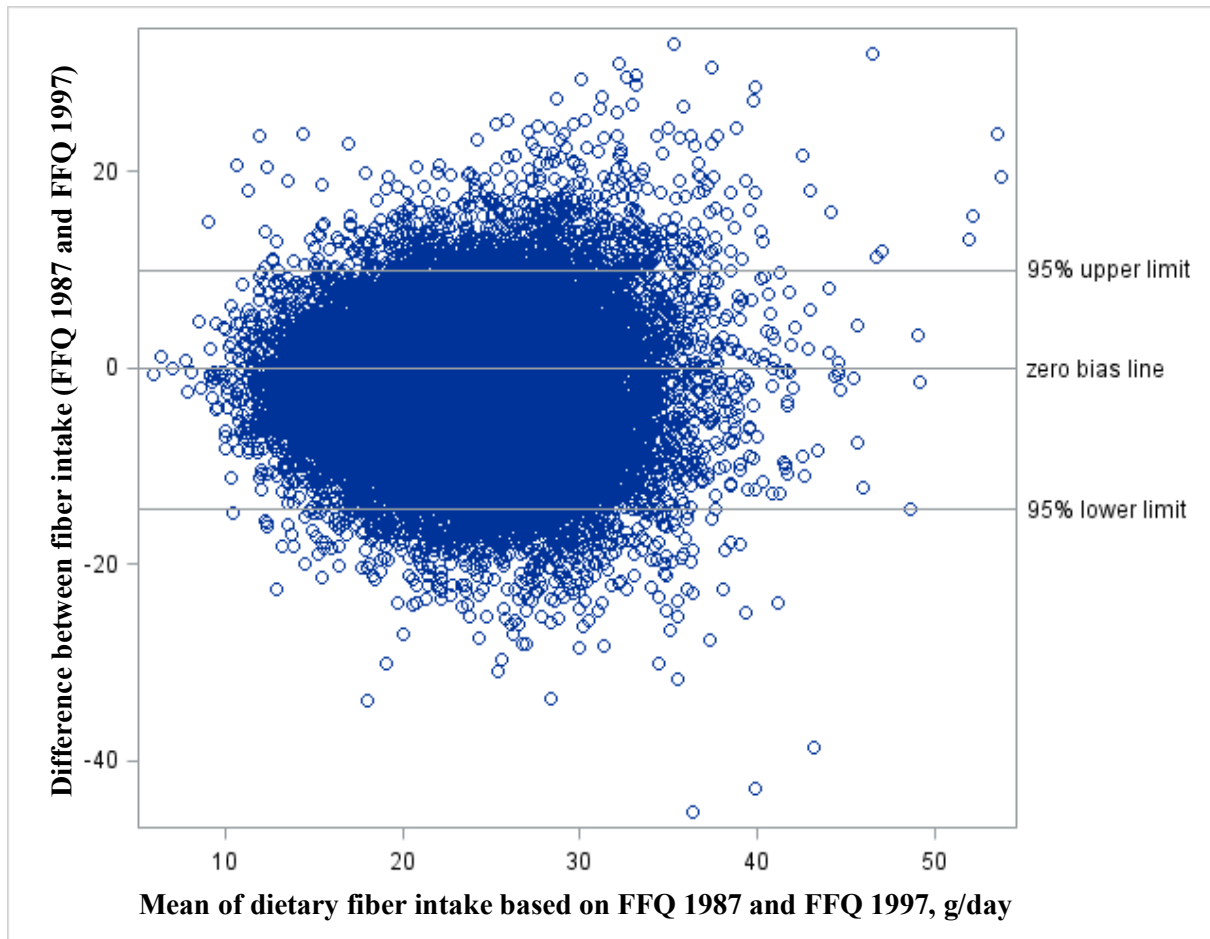

**Supplementary Figure S2.** Bland-Altman plot<sup>1,2</sup> comparing data on total dietary fiber intake collected using FFQ 1987 and FFQ 1997

#### References

- <sup>1</sup> Bland, J. M. & Altman, D. G. Statistical methods for assessing agreement between two methods of clinical measurement. *Lancet* **1**, 307–310 (1986).
- <sup>2</sup> Bland, J. M. & Altman, D. G. Measuring agreement in method comparison studies. *Stat Methods Med Res* **8**, 135–160 (1999).

**Supplementary Table S2.** Hazard Ratio (95% CI) of COPD stratified by calendar year of follow-up by quintiles of baseline energy-adjusted total dietary fiber, the Swedish Mammography Cohort

| Time of COPD diagnose, years                    | Quintiles of baseline dietary fiber intake, g/day (median) |                     |                     |                     |                     | Baseline dietary fiber intake up to 25 g/day <sup>a</sup> |         |
|-------------------------------------------------|------------------------------------------------------------|---------------------|---------------------|---------------------|---------------------|-----------------------------------------------------------|---------|
|                                                 | <17.6<br>(15.6)                                            | 17.6-20.5<br>(19.2) | 20.6-23.1<br>(21.8) | 23.2-26.4<br>(24.6) | ≥26.5<br>(29.1)     | Per 1-gram                                                | P-trend |
| <b>1998-2001 (4 years) n=160</b>                |                                                            |                     |                     |                     |                     |                                                           |         |
| No. of cases/No. women                          | 44/7311                                                    | 25/7297             | 32/7294             | 27/7288             | 32/7293             |                                                           |         |
| Multivariable-adjusted HR <sup>a</sup> (95% CI) | 1.00                                                       | 0.68<br>(0.42-1.17) | 0.96<br>(0.61-1.53) | 0.81<br>(0.54-1.44) | 1.02<br>(0.64-1.63) | 0.97<br>(0.93-1.01)                                       | 0.17    |
| <b>2002-2008 (7 years) n=739</b>                |                                                            |                     |                     |                     |                     |                                                           |         |
| No. of cases/No. women                          | 219/7311                                                   | 146/7288            | 149/7294            | 107/7288            | 118/7293            |                                                           |         |
| Multivariable-adjusted HR <sup>a</sup> (95% CI) | 1.00                                                       | 0.83<br>(0.67-1.02) | 0.91<br>(0.73-1.12) | 0.69<br>(0.54-0.87) | 0.75<br>(0.60-0.94) | 0.96<br>(0.94-0.99)                                       | <0.001  |
| <b>2009-2014 (6 years) n=818</b>                |                                                            |                     |                     |                     |                     |                                                           |         |
| No. of cases/No. women                          | 227/7311                                                   | 168/7288            | 141/7294            | 141/7288            | 141/7293            |                                                           |         |
| Multivariable-adjusted HR <sup>a</sup> (95% CI) | 1.00                                                       | 0.86<br>(0.70-1.05) | 0.77<br>(0.62-0.96) | 0.79<br>(0.64-0.98) | 0.81<br>(0.65-1.00) | 0.97<br>(0.95-0.99)                                       | 0.003   |

<sup>a</sup>Adjusted for age (continuous), education (less than high school, high school, or university), BMI (<18.5; 18.5-24.9; 25.0-29.9, or ≥30.0 kg/m<sup>2</sup>), walking or cycling (<20, 20-60, >60 min/day), smoking status and pack-years of smoking (never; past <20, 20-39, or ≥40 pack-years; or current <20, 20-39, or ≥40 pack-years), intake of energy (kcal/day, quintiles) and alcohol consumption (g/day, quintiles).
